# Supplementary material for: Extremely effective separations of pyridine/picoline mixtures through supramolecular chemistry strategies employing (4 R ,5 R )-bis(diphenylhydroxymethyl)-2-spiro-1′-cyclohexane-1,3-dioxolane as the host compound
Source: Royal Society of Chemistry journal article supplement (doi:10.1039/d5ce00111k), 2025-01-01
Supplement: d5ce00111k1.pdf [file d5ce00111k1.pdf]

# Extremely effective separations of pyridine/picoline mixtures through supramolecular chemistry strategies employing (4*R*,5*R*)-bis(diphenylhydroxymethyl)-2-spiro-1'-cyclohexane-1,3-dioxolane as the host compound

Daniella L. Recchia,\* Benita Barton and Eric C. Hosten

Department of Chemistry, PO Box 77000, Nelson Mandela University, Port Elizabeth, 6031, South Africa. E-mail: [s220241104@mandela.ac.za](mailto:s220241104@mandela.ac.za)

## TADDOL6 NMR spectra

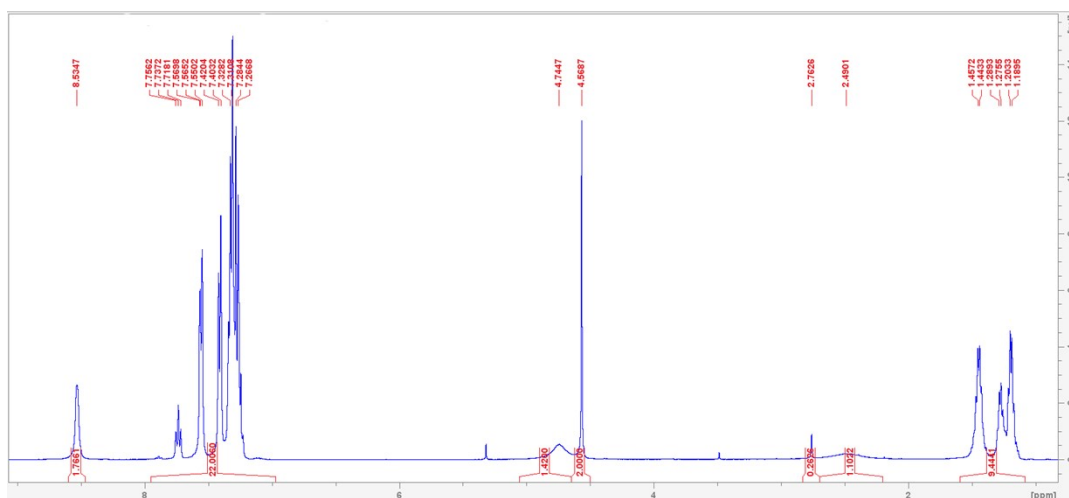

Figure S1 <sup>1</sup>H-NMR spectrum for equimolar binary PYR/2MP.

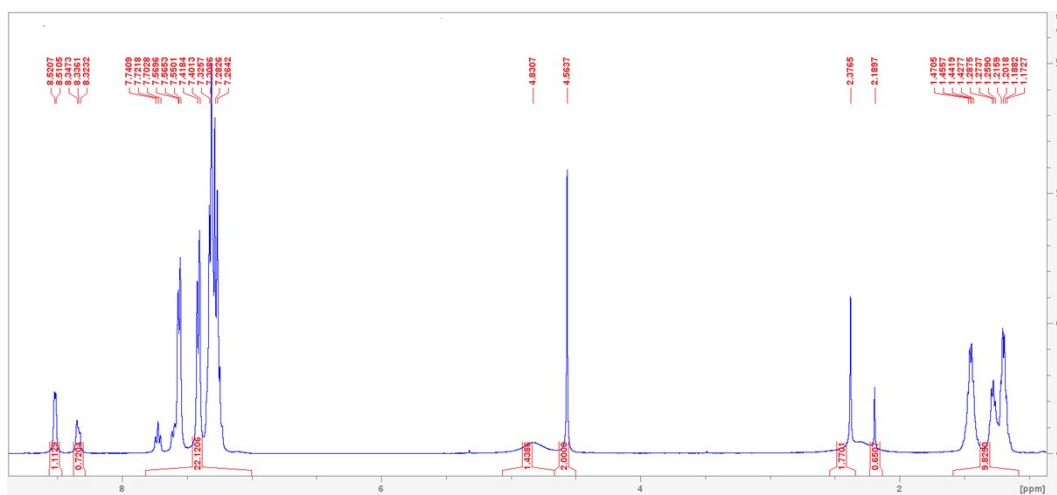

Figure S2 <sup>1</sup>H-NMR spectrum for equimolar binary PYR/3MP.

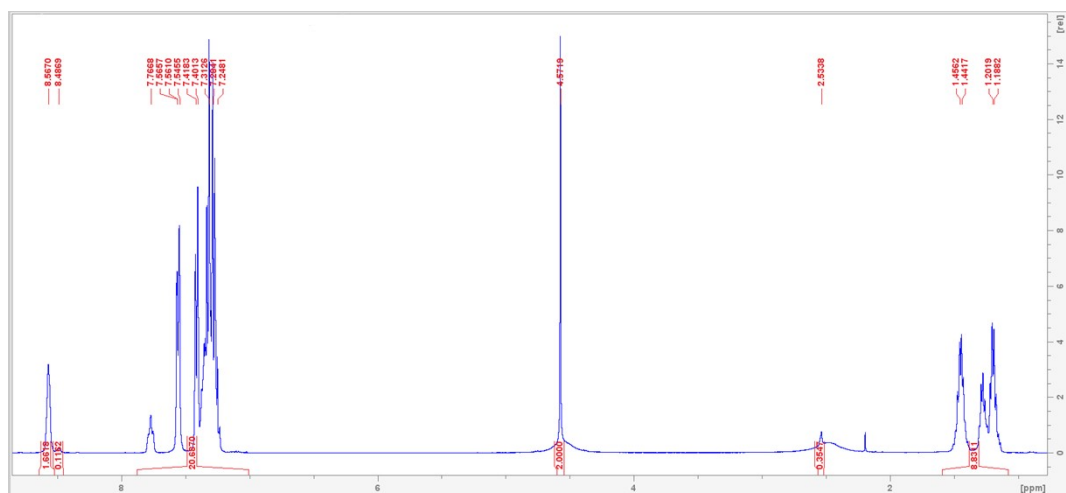

Figure S3  $^1\text{H}$ -NMR spectrum for equimolar binary PYR/4MP.

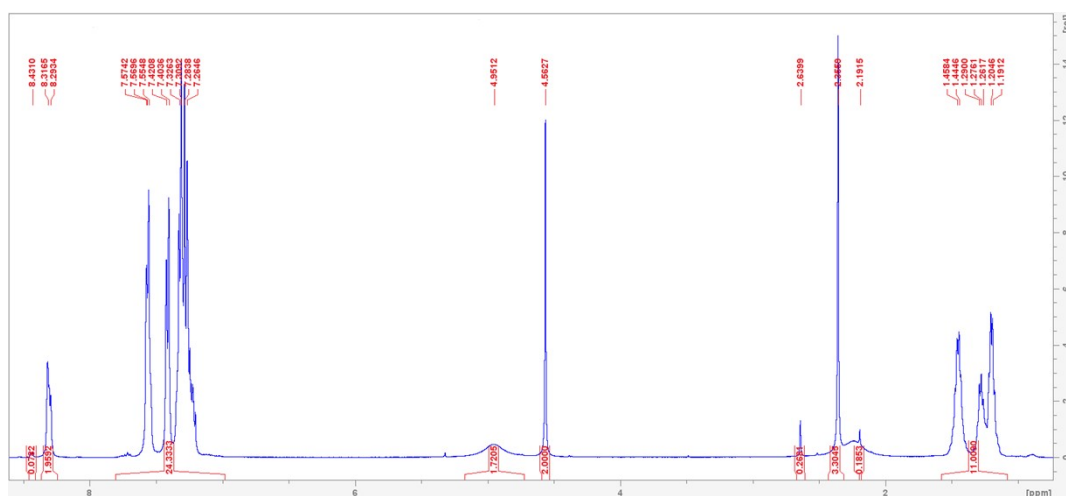

Figure S4  $^1\text{H}$ -NMR spectrum for equimolar binary 2MP/3MP.

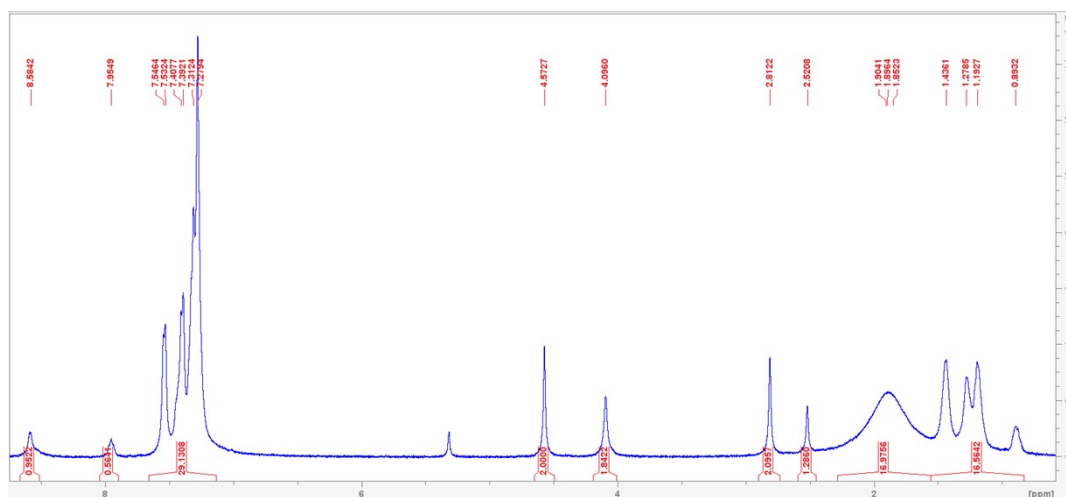

Figure S5  $^1\text{H}$ -NMR spectrum for equimolar binary 3MP/4MP.

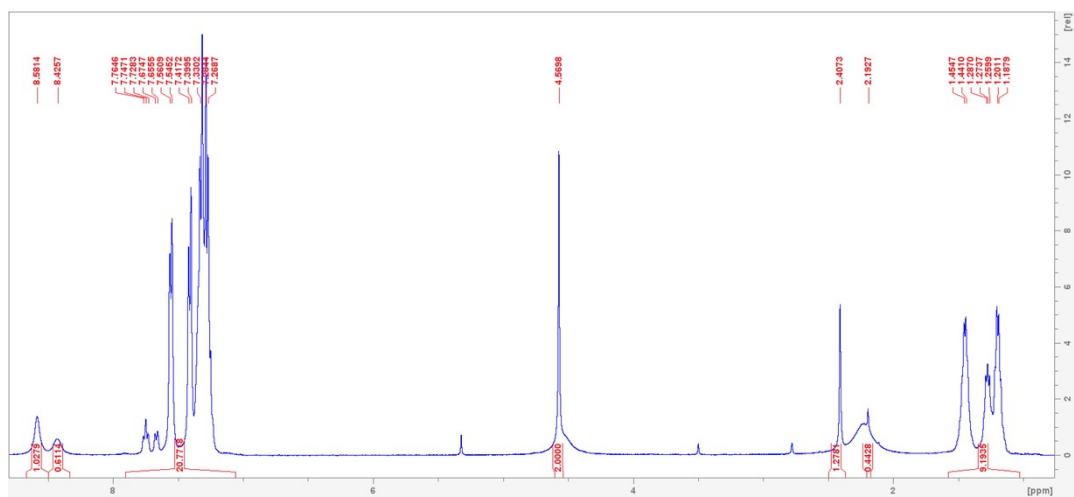

Figure S6  $^1\text{H-NMR}$  spectrum for equimolar ternary PYR/2MP/3MP.

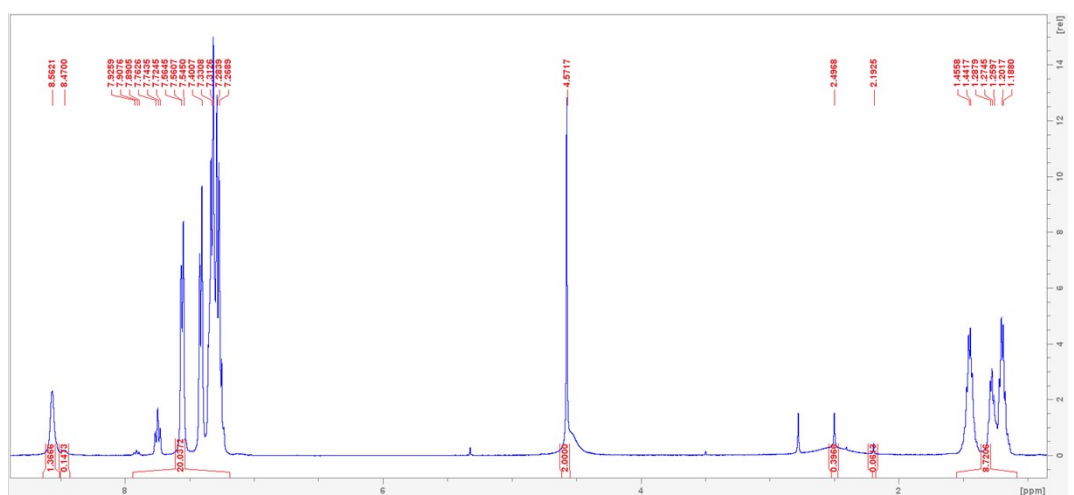

Figure S7  $^1\text{H-NMR}$  spectrum for equimolar ternary PYR/2MP/4MP.

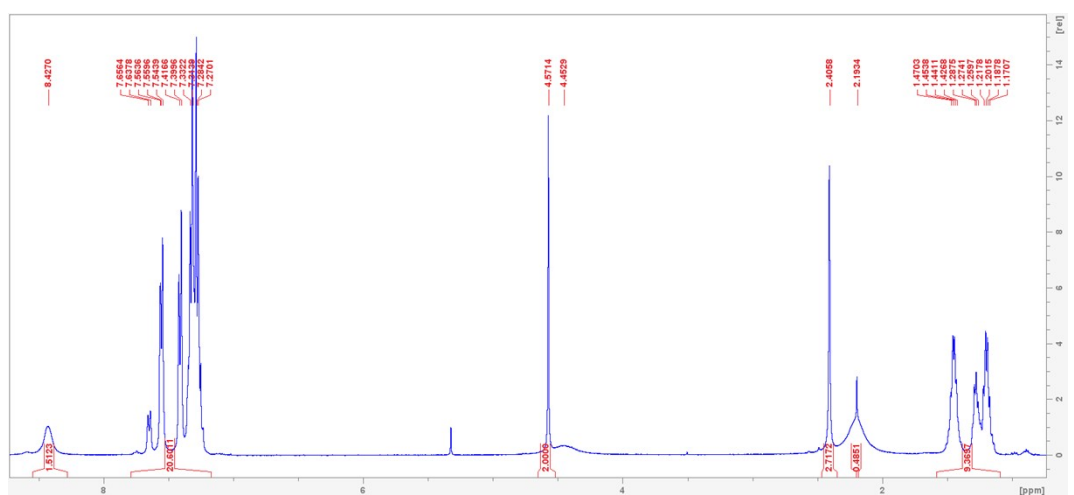

Figure S8  $^1\text{H-NMR}$  spectrum for equimolar ternary PYR/3MP/4MP.

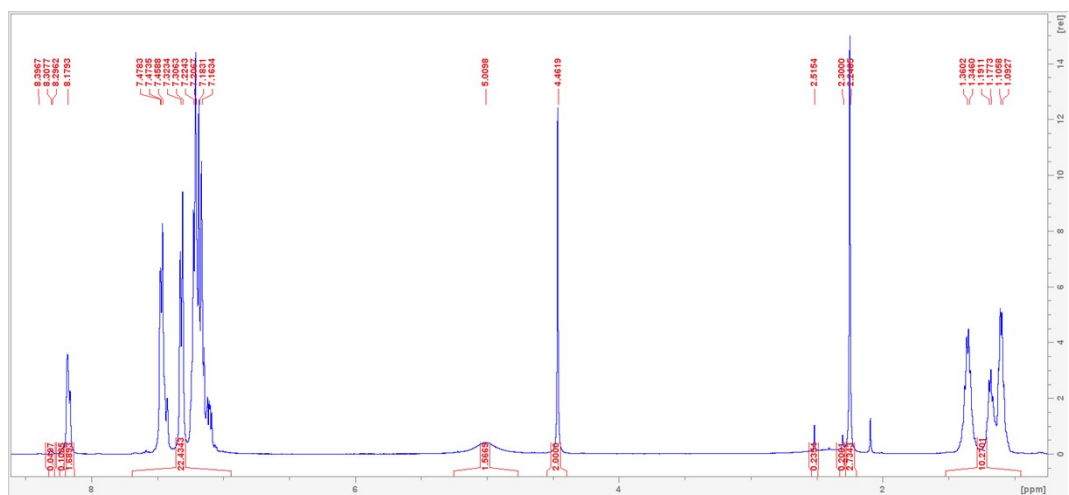

Figure S9 <sup>1</sup>H-NMR spectrum for equimolar ternary 2MP/3MP/4MP.

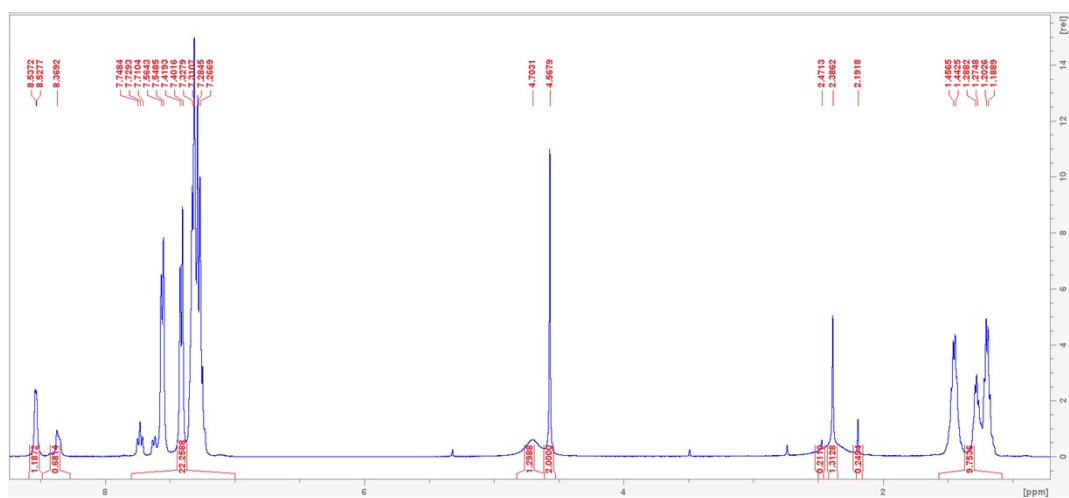

Figure S10 <sup>1</sup>H-NMR spectrum for equimolar quaternary PYR/2MP/3MP/4MP.

a)

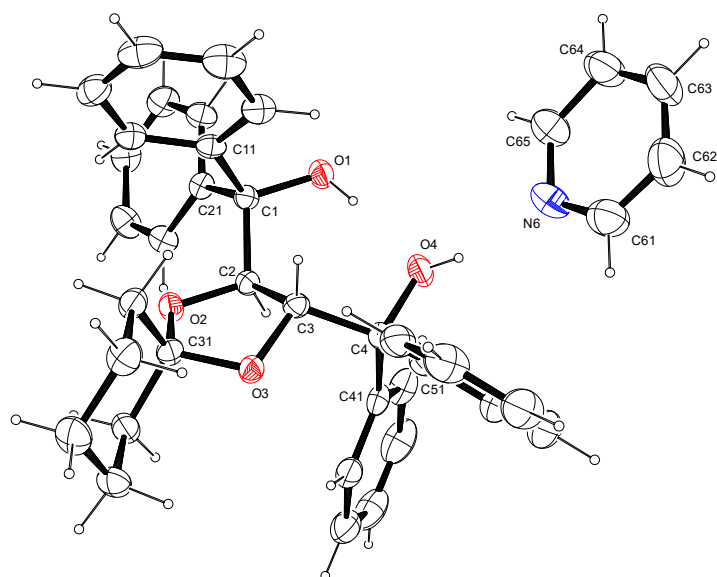

b)

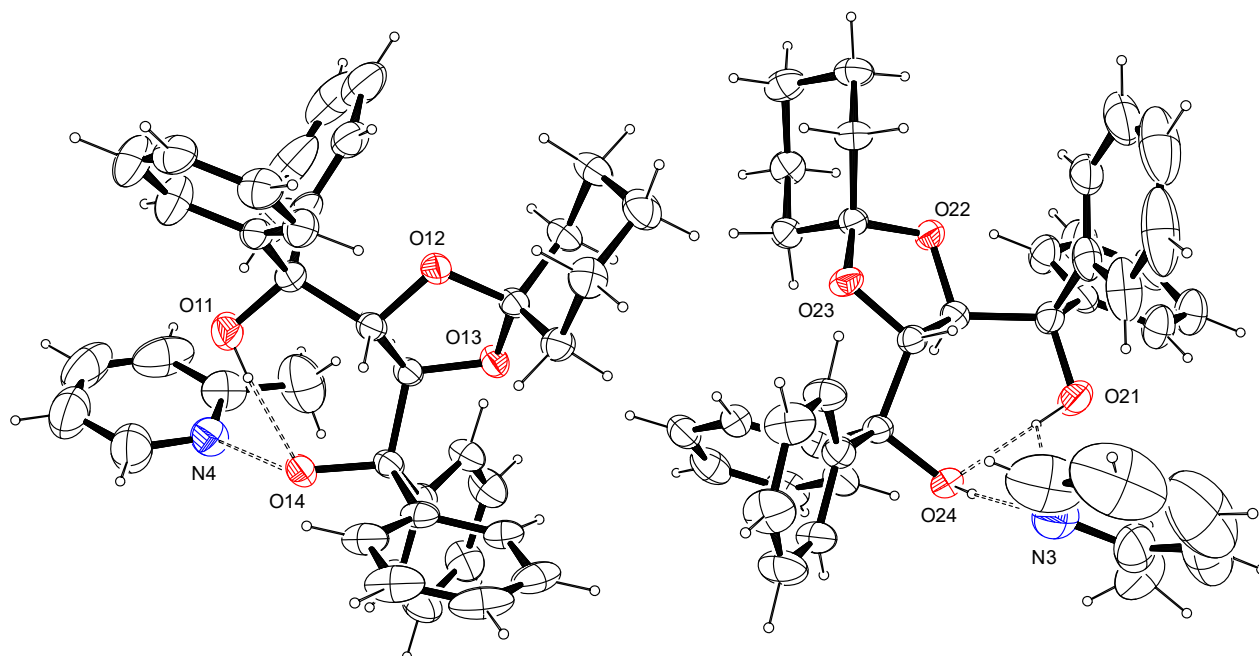

c)

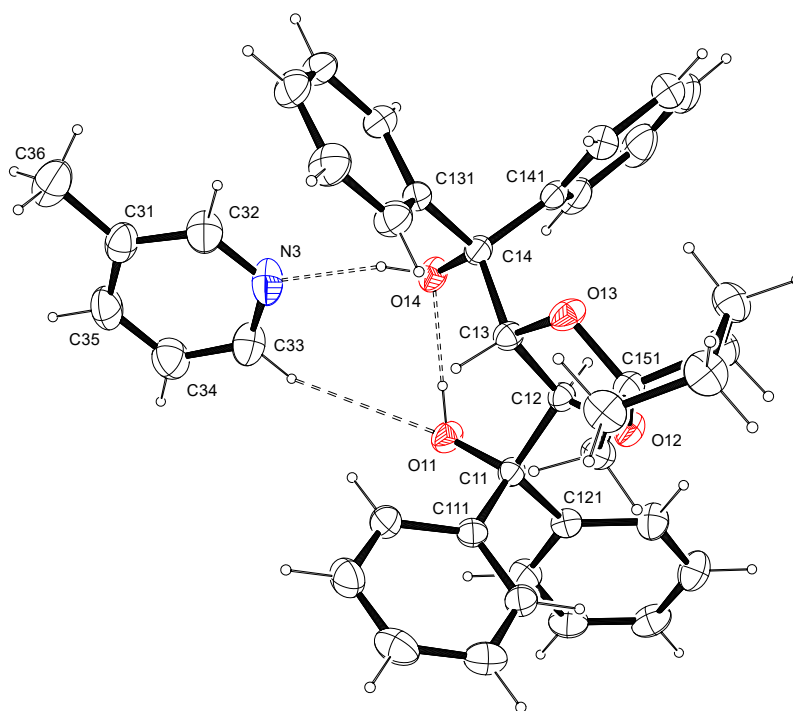

d)

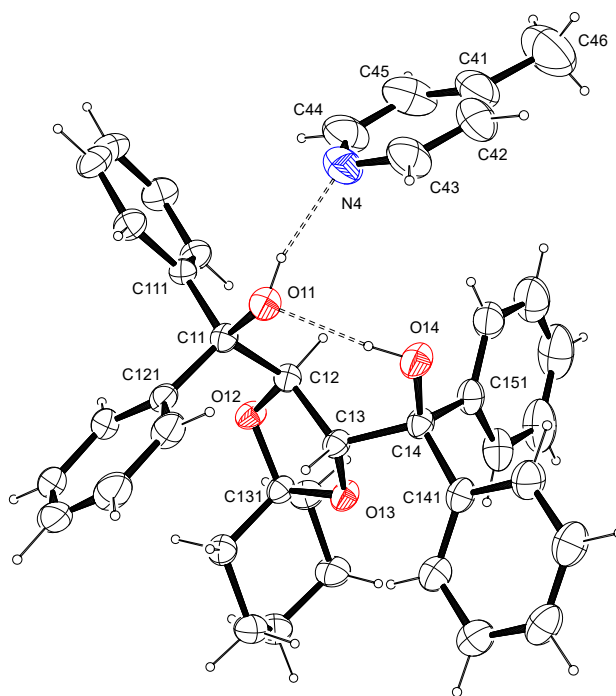

**Figure S11** ORTEP diagrams for (a) TADDOL6-PYR, (b) TADDOL6-2MP, (c) TADDOL6-3MP and (d) TADDOL6-4MP.

**Table S1** The (host) $\pi\cdots\pi$ (guest) stacking interactions, slippages and symmetry codes for complexes

| Parameter                                | TADDOL6-PYR | TADDOL6-2MP | TADDOL6-3MP              | TADDOL6-4MP |
|------------------------------------------|-------------|-------------|--------------------------|-------------|
| (host) $\pi\cdots\pi$ (guest)/Å          | 3.622(1)    | -           | 3.735(1)<br>3.729(1)     | -           |
| (host) $\pi\cdots\pi$ (guest) slippage/Å | 1.194       | -           | 1.770<br>1.216           | -           |
| Symmetry codes                           | 1+x, y, z   | -           | -1+x, y, z<br>-1+x, y, z | -           |

TADDOL6-PYR, TADDOL6-2MP, TADDOL6-3MP an TADDOL6-4MP.

**Table S2** The (host) $H\cdots\pi$ (guest) and (host) $C-H\cdots\pi$ (guest) interactions, the (host) $C-H\cdots\pi$ (guest) angles and the

| Parameter                              | TADDOL6-PYR                   | TADDOL6-2MP | TADDOL6-3MP | TADDOL6-4MP |
|----------------------------------------|-------------------------------|-------------|-------------|-------------|
| (host) $H\cdots\pi$ (guest)/Å          | 2.965<br>2.747                | -           | 2.891       | -           |
| (host) $C-H\cdots\pi$ (guest)/Å        | 3.648(3)<br>3.639(3)          | -           | 3.645(3)    | -           |
| (host) $C-H\cdots\pi$ (guest) $^\circ$ | 130<br>157                    | -           | 144         | -           |
| Symmetry codes                         | x, y, z<br>-1/2+x, 1/2-y, 1-z | -           | x, 1+y, 1+z | -           |

symmetry codes for complexes TADDOL6-PYR, TADDOL6-2MP, TADDOL6-3MP an TADDOL6-4MP.

**Table S3** The (host) $H\cdots N$ (guest) and (host) $O\cdots N$ (guest) interactions, the (host) $O-H\cdots N$ (guest) angles and the

| Parameter                                         | TADDOL6-PYR | TADDOL6-2MP                                                | TADDOL6-3MP          | TADDOL6-4MP          |
|---------------------------------------------------|-------------|------------------------------------------------------------|----------------------|----------------------|
| (host) $H\cdots N$ (guest)/Å                      | 1.91        | 1.88<br>1.78 <sup>a</sup><br>2.03 <sup>b</sup>             | 1.87<br>1.88         | 1.91<br>1.91         |
| (host) $O\cdots N$ (guest)/Å                      | 2.713(3)    | 2.701(3)<br>2.564(8) <sup>a</sup><br>2.791(4) <sup>b</sup> | 2.660(3)<br>2.668(3) | 2.730(3)<br>2.749(3) |
| (host) $O-H\cdots N$ (guest) $^\circ$             | 160         | 165<br>155 <sup>a</sup><br>151 <sup>b</sup>                | 155<br>155           | 166<br>174           |
| Symmetry codes                                    | x, y, z     | x, y, z                                                    | x, y, z              | x, y, z              |
| (host) $H\cdots O$ (host) <sup>c</sup> /Å         | 1.85        | 1.83<br>1.85                                               | 1.82<br>1.83         | 1.86<br>1.86         |
| (host) $O\cdots O$ (host) <sup>c</sup> /Å         | 2.688(2)    | 2.664(3)<br>2.686(3)                                       | 2.663(2)<br>2.667(2) | 2.749(2)<br>2.686(2) |
| (host) $O-H\cdots O$ (host) <sup>c</sup> $^\circ$ | 173         | 176<br>171                                                 | 177<br>176           | 169<br>169           |

symmetry codes for complexes TADDOL6-PYR, TADDOL6-2MP, TADDOL6-3MP an TADDOL6-4MP.
